# Supplementary material
Source: PubMed Central journal article supplement (PMC3408172)
Supplement: supp_M112.352625_jbc.M112.352625-1.pdf [file supp_M112.352625_jbc.M112.352625-1.pdf]

## Supplemental figure 1

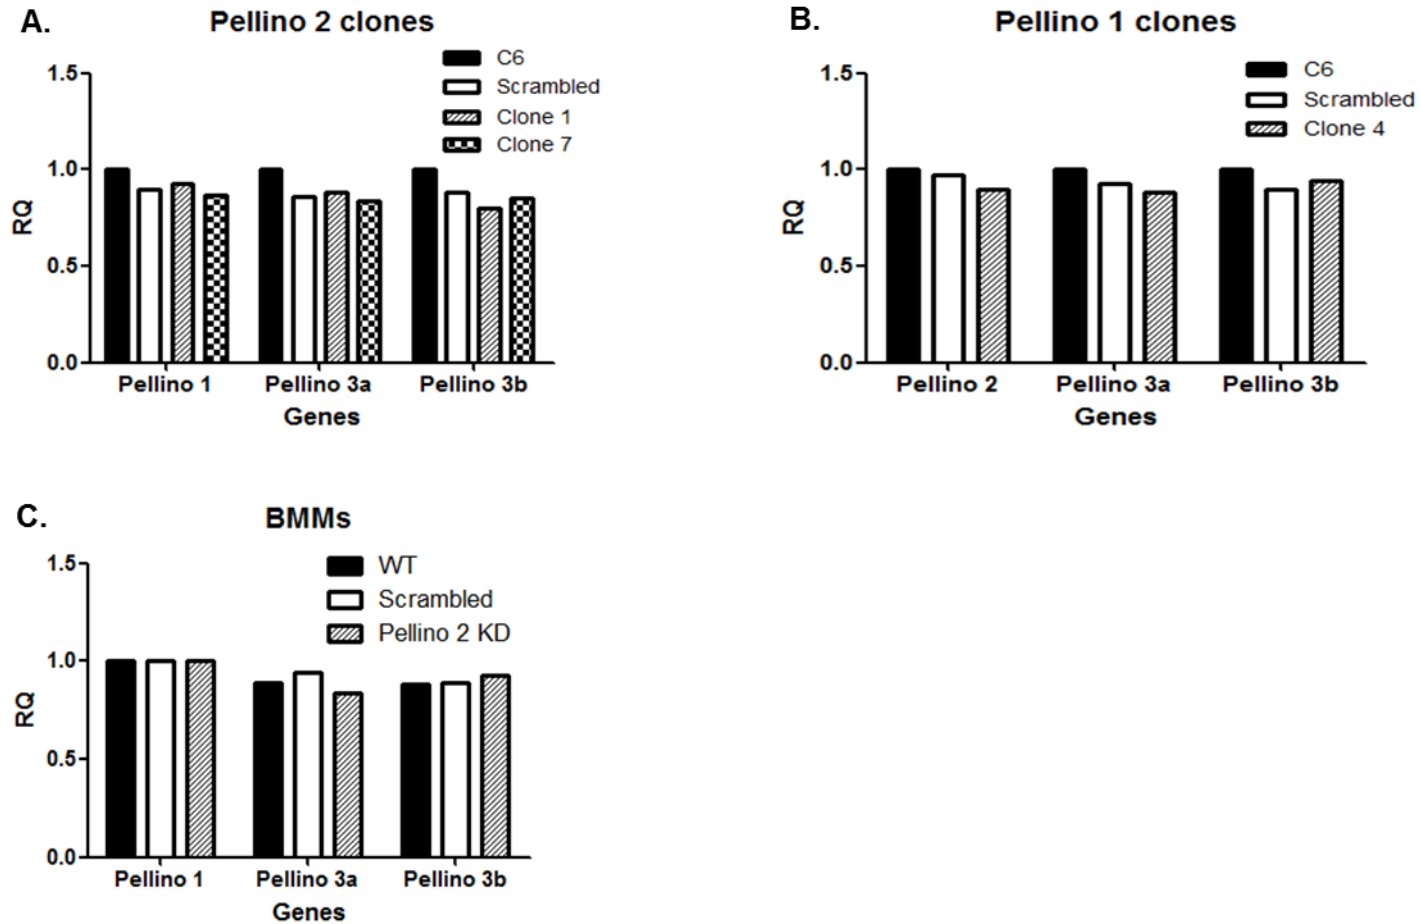

**Supplemental figure 1. The knock-down was specific to the target molecule.** Pellino 2 knockdown clones (Peli2C1 and Peli2C7) and control cells (scrambled) were subjected to analysis by human Pellino 1/ Pellino 3a/ Pellino 3b quantitative real-time PCR. B. Pellino 1 knockdown clones (Peli1C4) and control cells (scrambled) were subjected to analysis by human Pellino 2/ Pellino 3a/ Pellino 3b specific quantitative Real-time PCR. C. Pellino 2 knockdown BMMs and control BMMs (scrambled) were subjected to analysis by mouse Pellino 1/ Pellino 3a/ Pellino 3b specific quantitative Real-time PCR.
